# Supplementary material
Source: Research Square preprint supplement (doi:10.21203/rs.3.rs-9249546/v1)
Supplement: Supplementary file 1 [file feab076a6cf6d856703a8ea3.docx]

## Medicalization in platform society: Evidence from the construction of health knowledge on Bilibili - Appendix

# 1. Prompt and labeling protocol

We classified Bilibili health-related videos into three ideal-typical types using a large language model (LLM). The model was instructed to label each record based on the concatenated video title and description (input formatted as aid.text, where aid is the video identifier). For each record, the model returned a JSON object with three fields: aid, type, and confidence. The final output was a list of JSON objects enclosed in brackets [], separated by commas. We constrained aid to one decimal place, confidence to the range 0–1, and type to one of three string labels (“一”, “二”, “三”). The prompt used for batch labeling was:

Task instruction (translated and standardized):

Your task is to classify the title and description of Bilibili health-related videos. For each input in the format aid.text, choose the most appropriate category and return the result in JSON format. Output a list in the form [{...}, {...}], where each item is {"aid": aid, "type": type, "confidence": confidence}. Keep aid to one decimal place. type must be one of “一”, “二”, “三”. confidence must be between 0 and 1.

Category definitions:

Type “一” (Medicalized). The text frames health issues within biomedical authority by referencing disease names (e.g., cancer, HPV), medical technologies (e.g., surgery, pharmaceuticals), or professional roles and institutions (e.g., doctors, hospitals). It emphasizes medical definition, diagnosis, or treatment intervention.

Example: “[Doctor-led explainer] How terrible is Helicobacter pylori?” “If you suspect you are infertile, you need to do these tests...” “If you eat like this every day, you are simply committing chronic suicide! | Guide to self-help for stomach problems”

Type “二” (De-medicalized). The text explicitly resists or qualifies biomedical authority by (a) shifting from technical intervention to non-technical or self-managed approaches (e.g., exercise substituting medication), (b) criticizing medical authority or weakening pathologizing labels (e.g., “rationally view pulmonary nodules”), or (c) relying on traditional medical systems not fully subsumed by biomedicine (e.g., herbal remedies) in ways that signal reflection on, or resistance to, medicalization.

Examples: “Detox is a lie… sweating, foot patches, extreme diets… ‘detox’ itself is a pseudo-concept.” “Doctors are not omnipotent, but life without doctors is impossible; do not deify doctors.” “Two herbs to promote circulation and relieve cervical/lumbar pain.”

Type “三” (Non-medicalized). The text is not anchored in modern medical systems and instead draws on everyday tips, folk knowledge, or culturally grounded practices without explicit biomedical framing.

Examples: “Milk or soy milk, which is more nutritious and better for weight loss?” “A plant native to Guangdong and Guangxi… now cultivated locally; used as a medicinal cuisine ingredient.” “What exactly is IQ? How can we improve IQ? IQ is different from what we know. IQ is different from what we understand, he is not a certain indicator, but a rational comprehensive ability. Genetics - life environment determines our intellectual development, and it is better to keep IQ online in life through the knowledge of IQ.”

This protocol was designed to ensure consistent, machine-readable outputs and to operationalize distinctions among medicalized, de-medicalized, and non-medicalized framings using explicit textual cues in titles and descriptions.

# 2. Human validation and reliability

To assess classification reliability, we conducted a human validation on a random sample of 600 videos drawn from the analytic dataset. Human coders annotated the same title–description text using the category definitions above and treated this coding as the gold standard. Agreement between the LLM output and the human gold standard reached 97.3% accuracy with Cohen’s κ = 0.96, indicating very high reliability.

Confusion matrix comparing human-coded and LLM-generated labels

| Human-coded / LLM-generated | Medicalized | De-medicalized | Non-medicalized |
| --- | --- | --- | --- |
| Medicalized | 198 | 3 | 3 |
| De-medicalized | 1 | 189 | 0 |
| Non-medicalized | 1 | 8 | 197 |

Error inspection suggests that misclassifications were distributed across categories rather than reflecting systematic biases in the model.
